# Supplementary material
Source: publisher figshare collection journal article supplement (https://gsapubs.figshare.com/ndownloader/files/22741571)
Supplement: Supplementary file 1 [file 22741571]

GSA Data Repository Item # 8716

Title of article Lithophile-element mineralization associated with Late Cretaceous two-mica granites in the Great Basin

Author(s) Mark D. Barton

see Geology v. 15, p. 337 - 340

Contents 11 pages

Appendix 1 - Synopsis of Geologic and Geochemical Data

---

---

---

---

---

---

---

---

---

---

Lithophile-element mineralization associated with Late Cretaceous two-mica granites in the Great Basin

Mark D. Barton

APPENDIX 1. SYNOPSIS OF GEOLOGIC AND GEOCHEMICAL DATA

| Name                                                     | Birch Creek<br>(BC)                                                                                                                                                                                                    | Dawley Canyon<br>(DC)                                                                                                                            | Kern Mountains<br>(KM)                                                                                                                                                                                                                                    |
|----------------------------------------------------------|------------------------------------------------------------------------------------------------------------------------------------------------------------------------------------------------------------------------|--------------------------------------------------------------------------------------------------------------------------------------------------|-----------------------------------------------------------------------------------------------------------------------------------------------------------------------------------------------------------------------------------------------------------|
| Feature                                                  |                                                                                                                                                                                                                        |                                                                                                                                                  |                                                                                                                                                                                                                                                           |
| IGNEOUS                                                  |                                                                                                                                                                                                                        |                                                                                                                                                  |                                                                                                                                                                                                                                                           |
| Major phases                                             | two-mica granodiorite to<br>two-mica monzogranite <sup>2</sup>                                                                                                                                                         | two-mica monzogranite <sup>1</sup>                                                                                                               | two-mica monzogranite or<br>two-mica granodiorite <sup>5</sup>                                                                                                                                                                                            |
| Extent                                                   | ~15 km <sup>2</sup> <sup>1</sup>                                                                                                                                                                                       | ~10 km <sup>2</sup> <sup>5</sup>                                                                                                                 | ~90 km <sup>2</sup> <sup>5</sup>                                                                                                                                                                                                                          |
| Mineralogy                                               | Pc+Qz+Kspr(Mi)+Bi+Mu±Zir<br>±Ap±Fl±Ep <sup>2</sup>                                                                                                                                                                     | Kspr(Mi)+Alb+Qz+Bi<br>+Mu±Ap±Gt±Be±Zir <sup>1</sup>                                                                                              | Qz+Pc+Kspr(Or)+Bi+Mu<br>±Ap±Zir <sup>5</sup>                                                                                                                                                                                                              |
| Textures/distribution                                    | medium-grained (2-4 mm) with<br>K-feldspar megacrysts,<br>interstitial Mu <sup>2</sup>                                                                                                                                 | fine- to medium-grained<br>equigranular <sup>1,2</sup>                                                                                           | coarse-grained, somewhat<br>porphyritic (Mu+Kspr) <sup>5</sup>                                                                                                                                                                                            |
| Minor phases                                             | aprites and pegmatites <sup>2,3</sup>                                                                                                                                                                                  | pegmatites and aprites<br>(albite granites) <sup>2</sup>                                                                                         | aprites and pegmatites<br>(aplitic border phase)                                                                                                                                                                                                          |
| Extent                                                   | <5% <sup>3</sup>                                                                                                                                                                                                       | <5%                                                                                                                                              | widespread, but sparse                                                                                                                                                                                                                                    |
| Mineralogy                                               | Qz+Kspr+Pc+Gt+Bi+Mu(?) <sup>3</sup>                                                                                                                                                                                    | Qz+Kspr+Pc(Alb)+Bi+Gt±Be<br>±Tour±Ap±Columb±And±Sill <sup>2</sup>                                                                                | Qz+Kspr+Pc+Mu±Gt                                                                                                                                                                                                                                          |
| Textures/distribution                                    | aplitic to pegmatitic <sup>3</sup>                                                                                                                                                                                     | complex pegmatitic/aplitic to<br>quartz veins near top <sup>2</sup>                                                                              | aplitic, rarely pegmatitic,<br>interior dikes and border zone                                                                                                                                                                                             |
| Age(s), (methods)                                        | 80 ± 4 (K-Ar, bi) ;<br>77 ± 2 (K-Ar, bi) <sup>1</sup>                                                                                                                                                                  | 83.9 ± 1.3 (Rb-Sr, w.r.) <sup>1</sup>                                                                                                            | 71 ± 6 (Rb-Sr, w.r.) <sup>4</sup> ;<br>75 ± 9 (U-Pb, zir) <sup>3</sup> ;<br>69 ± ? (Ar-Ar, mu) <sup>6</sup>                                                                                                                                               |
| Whole rock comp.(s)                                      | yes <sup>5</sup>                                                                                                                                                                                                       | yes <sup>1</sup>                                                                                                                                 | yes <sup>5</sup>                                                                                                                                                                                                                                          |
| Normative Al <sub>2</sub> O <sub>3</sub>                 |                                                                                                                                                                                                                        | 3.0-4.3%                                                                                                                                         | 1.7 (0.5-5.7)%                                                                                                                                                                                                                                            |
| δ <sup>18</sup> O                                        | 9.5‰ (w.r.) <sup>5</sup>                                                                                                                                                                                               | 13.4‰ (w.r.) <sup>4</sup> , 14.9‰ (qz) <sup>1</sup>                                                                                              | 8.1‰ (mu) <sup>1</sup> , 9.5‰ (w.r.) <sup>2</sup>                                                                                                                                                                                                         |
| δD                                                       |                                                                                                                                                                                                                        |                                                                                                                                                  | -62‰ (mu) <sup>1</sup>                                                                                                                                                                                                                                    |
| ( <sup>87</sup> Sr/ <sup>86</sup> Sr) <sub>initial</sub> | 0.71285 <sup>4</sup>                                                                                                                                                                                                   | 0.7372 <sup>1</sup>                                                                                                                              | 0.719 ± 0.002 <sup>5,4</sup>                                                                                                                                                                                                                              |
| ε <sub>Nd</sub>                                          | -18.3 <sup>4</sup> (corrected to 80 Ma)                                                                                                                                                                                | -9.7 <sup>3</sup>                                                                                                                                | -19.1 <sup>7</sup>                                                                                                                                                                                                                                        |
| Pb                                                       |                                                                                                                                                                                                                        |                                                                                                                                                  | yes (suggest 1.97 ± Ga) <sup>3</sup>                                                                                                                                                                                                                      |
| Rb/Sr                                                    | 0.19 <sup>4</sup>                                                                                                                                                                                                      | 3.0 ± 0.6 <sup>1</sup>                                                                                                                           | 0.27 ± 0.03 <sup>5</sup>                                                                                                                                                                                                                                  |
| REE                                                      | La/Yb~30, Eu/Eu*~1 <sup>5</sup>                                                                                                                                                                                        | La/Yb~12, Eu/Eu*~0.7 <sup>1</sup>                                                                                                                |                                                                                                                                                                                                                                                           |
| Other Trace Elements                                     | yes <sup>5</sup>                                                                                                                                                                                                       | yes <sup>1</sup>                                                                                                                                 |                                                                                                                                                                                                                                                           |
| References                                               | <sup>1</sup> McKee and Nash (1967)<br><sup>2</sup> Nelson and Sylvester (1971)<br><sup>3</sup> Pickering and Barton<br>(unpublished data)<br><sup>4</sup> V. Bennett (unpublished data)<br><sup>5</sup> Griffis (1986) | <sup>1</sup> Kistler et al. (1981)<br><sup>2</sup> Olson and Hinrichs (1960)<br><sup>3</sup> Farmer and DePaolo (1983)<br><sup>4</sup> Estimated | <sup>1</sup> Lee et al. (1984b)<br><sup>2</sup> Lee et al. (1981)<br><sup>3</sup> Lee et al. (1984c)<br><sup>4</sup> Lee et al. (1980)<br><sup>5</sup> Best et al. (1974)<br><sup>6</sup> P. Gans (pers. comm.)<br><sup>7</sup> Farmer and DePaolo (1983) |

# Lithophile-element mineralization associated with Late Cretaceous two-mica granites in the Great Basin

Mark D. Barton

| Name                                                     | Lexington Creek<br>(LC)                                                                                                                                                                                                                               | McCullough Butte<br>(MB)                                                                                                                                                                                             | Mount Wheeler Mine<br>(MW)             |
|----------------------------------------------------------|-------------------------------------------------------------------------------------------------------------------------------------------------------------------------------------------------------------------------------------------------------|----------------------------------------------------------------------------------------------------------------------------------------------------------------------------------------------------------------------|----------------------------------------|
| Feature                                                  |                                                                                                                                                                                                                                                       |                                                                                                                                                                                                                      |                                        |
| IGNEOUS                                                  |                                                                                                                                                                                                                                                       |                                                                                                                                                                                                                      |                                        |
| Major phases                                             | two-mica granodiorite or monzogranite <sup>1</sup>                                                                                                                                                                                                    | two-mica monzogranite <sup>1</sup>                                                                                                                                                                                   |                                        |
| Extent                                                   | ~6 km <sup>2</sup> <sup>2</sup>                                                                                                                                                                                                                       | <0.01 km <sup>2</sup> <sup>2</sup>                                                                                                                                                                                   |                                        |
| Mineralogy                                               | Qz+Pc+Kspr+Mu+Bi±<br>Ap±Zir±Fl±Mt±Ep <sup>1</sup>                                                                                                                                                                                                     | Qz+Pc+Kspr+Mu+Bi±monazite<br>±Nb-rich Ilm±Ap±Zir <sup>1</sup>                                                                                                                                                        |                                        |
| Textures/distribution                                    | medium-grained, equigranular, locally porphyritic                                                                                                                                                                                                     | fine-grained (~1mm) porphyritic dikes and sills, Qz+Mu+Kspr+Pc phenocrysts <sup>1,2</sup>                                                                                                                            |                                        |
| Minor phases                                             | aprites                                                                                                                                                                                                                                               | minor aprites, felsite dikes <sup>1</sup>                                                                                                                                                                            | felsite dikes <sup>1</sup>             |
| Extent                                                   | <5%                                                                                                                                                                                                                                                   | a few dikes, <2m thick <sup>1</sup>                                                                                                                                                                                  | a few dikes, <2m <sup>1</sup>          |
| Mineralogy                                               | Qz+Kspr+Pc+Mu±?                                                                                                                                                                                                                                       | Chl+Carb+Qz+Py±Ser±Clays after feldspar, mafics                                                                                                                                                                      |                                        |
| Textures/distribution                                    | aplitic commonly with pegmatitic centers                                                                                                                                                                                                              | fine-grained, commonly porphyritic                                                                                                                                                                                   | fine grained, porphyritic              |
| Age(s), (methods)                                        | 86.3, 82.2, 77.9 ± 1.9 (K-Ar, Mu) <sup>4</sup>                                                                                                                                                                                                        | 83.8 ± 1.9, 76.3 ± 6.3, 73.1 ± 6.0 (K-Ar, Mu), 47.5 ± 1.0 (K-Ar, Bi) <sup>5</sup>                                                                                                                                    |                                        |
| Whole rock comp.(s)                                      | yes <sup>1</sup>                                                                                                                                                                                                                                      | yes <sup>1</sup>                                                                                                                                                                                                     |                                        |
| Normative Al <sub>2</sub> O <sub>3</sub>                 | 2.7%                                                                                                                                                                                                                                                  | 2.1% <sup>1</sup>                                                                                                                                                                                                    |                                        |
| δ <sup>18</sup> O                                        | 10.5‰ (w.r.), 8.9‰ (Mu) <sup>7</sup>                                                                                                                                                                                                                  | 13.2‰ (w.r.), 14.2‰ (Qz) <sup>3</sup>                                                                                                                                                                                |                                        |
| δD                                                       | -75‰ (Mu) <sup>7</sup>                                                                                                                                                                                                                                | -54‰ (Mu) <sup>3</sup>                                                                                                                                                                                               |                                        |
| ( <sup>87</sup> Sr/ <sup>86</sup> Sr) <sub>initial</sub> | 0.7114 <sup>5</sup>                                                                                                                                                                                                                                   | 0.71077 <sup>3,4</sup>                                                                                                                                                                                               |                                        |
| ε <sub>Nd</sub>                                          |                                                                                                                                                                                                                                                       | -10.2 <sup>3</sup>                                                                                                                                                                                                   |                                        |
| Pb                                                       | yes (suggests pC) <sup>6</sup>                                                                                                                                                                                                                        |                                                                                                                                                                                                                      |                                        |
| Rb/Sr                                                    | 0.17 <sup>5</sup>                                                                                                                                                                                                                                     | 0.25 ± 0.01 <sup>3</sup>                                                                                                                                                                                             |                                        |
| REE                                                      |                                                                                                                                                                                                                                                       | La/Yb~85, Eu/Eu*~1 <sup>3</sup>                                                                                                                                                                                      |                                        |
| Other Trace Elements                                     |                                                                                                                                                                                                                                                       | yes <sup>1</sup>                                                                                                                                                                                                     |                                        |
| References                                               | <sup>1</sup> Lee et al. (1981)<br><sup>2</sup> Whitebread (1969)<br><sup>3</sup> Barton (unpublished data)<br><sup>4</sup> Lee et al. (1980)<br><sup>5</sup> Lee et al. (1984a)<br><sup>6</sup> Lee et al. (1984c)<br><sup>7</sup> Lee et al. (1984b) | <sup>1</sup> Barton (in preparation)<br><sup>2</sup> Barton (1982)<br><sup>3</sup> Barton et al. (in preparation)<br><sup>4</sup> V. Bennett (unpublished data)<br><sup>5</sup> Barton and Marvin (unpublished data) | <sup>1</sup> Barton (unpublished data) |

# Lithophile-element mineralization associated with Late Cretaceous two-mica granites in the Great Basin

Mark D. Barton

| Name                                                     | Pole Canyon<br>(PC)                                                                                                                                                                                                                  | Rocky Canyon<br>(RC)                                                                           | Toana Range<br>(TR)                                                                                                                                                                                                                                    |
|----------------------------------------------------------|--------------------------------------------------------------------------------------------------------------------------------------------------------------------------------------------------------------------------------------|------------------------------------------------------------------------------------------------|--------------------------------------------------------------------------------------------------------------------------------------------------------------------------------------------------------------------------------------------------------|
| Feature                                                  |                                                                                                                                                                                                                                      |                                                                                                |                                                                                                                                                                                                                                                        |
| IGNEOUS                                                  |                                                                                                                                                                                                                                      |                                                                                                |                                                                                                                                                                                                                                                        |
| Major phases                                             | two-mica monzogranite,<br>minor two-mica granodiorite <sup>3</sup>                                                                                                                                                                   | two-mica monzogranite <sup>1</sup>                                                             | two-mica monzogranite <sup>2</sup>                                                                                                                                                                                                                     |
| Extent                                                   | ~10 km <sup>2</sup>                                                                                                                                                                                                                  | seen only in drill core                                                                        | ~10 km <sup>2</sup> <sup>5</sup>                                                                                                                                                                                                                       |
| Mineralogy                                               | Qz+Pc+Kspr+Mu+Bi±Ap<br>±Zir±Mon±Allanite <sup>2</sup>                                                                                                                                                                                | Qz+Pc+Kspr(Mi)+Bi<br>+Mu±? <sup>1</sup>                                                        | Qz+Pc+Kspr(Or)+Mu+Bi<br>±Ap±Zir <sup>2</sup>                                                                                                                                                                                                           |
| Textures/distribution                                    | coarse-grained (>5 mm) with<br>Kspr and Mu phenocrysts <sup>3</sup>                                                                                                                                                                  | fine--grained (~1 mm); Qz<br>and Kspr phenocrysts (2-4 mm)                                     | coarse-grained granite,<br>Mu phenocrysts                                                                                                                                                                                                              |
| Minor phases                                             | aprites ± pegmatite dikes<br>(<2m thick) <sup>3</sup>                                                                                                                                                                                |                                                                                                |                                                                                                                                                                                                                                                        |
| Extent                                                   | <50% <sup>3</sup>                                                                                                                                                                                                                    | <5%                                                                                            | widespread, but sparse                                                                                                                                                                                                                                 |
| Mineralogy                                               | Qz+Alkali fldspr+Mu±Gt±Fl<br>±Gahnite±Columbite±Beryl                                                                                                                                                                                |                                                                                                |                                                                                                                                                                                                                                                        |
| Textures/distribution                                    | aprites in dikes; rarer<br>micropegmatite                                                                                                                                                                                            |                                                                                                |                                                                                                                                                                                                                                                        |
| Age(s), (methods)                                        | 79.5 (Rb-Sr, w.r.) <sup>1</sup> ; aprites<br>are reported to be 31 <sup>3</sup> , but are<br>probably reset <sup>5</sup>                                                                                                             | 83.8 ± 1.9 (K-Ar, Mu),<br>84 (Rb-Sr, Mu)                                                       | 71.2 ± 2.0, 62.9 ± 1.9<br>75 ± 9 (K-Ar, Mu) <sup>6,7</sup> ;<br>128 (K-Ar, Bi) <sup>7</sup>                                                                                                                                                            |
| Whole rock comp.(s)                                      | yes <sup>3</sup>                                                                                                                                                                                                                     |                                                                                                | yes <sup>2</sup>                                                                                                                                                                                                                                       |
| Normative Al <sub>2</sub> O <sub>3</sub>                 | 1.7-3.5%                                                                                                                                                                                                                             |                                                                                                | 2.5%                                                                                                                                                                                                                                                   |
| δ <sup>18</sup> O                                        | 10.6-12.1‰ (w.r.) <sup>2</sup>                                                                                                                                                                                                       |                                                                                                | 9.1‰ (w.r.) <sup>2</sup>                                                                                                                                                                                                                               |
| δD                                                       | -60‰ (Mu) <sup>5</sup>                                                                                                                                                                                                               |                                                                                                | -62‰ (Mu) <sup>1</sup>                                                                                                                                                                                                                                 |
| ( <sup>87</sup> Sr/ <sup>86</sup> Sr) <sub>initial</sub> | 0.7157 <sup>1</sup>                                                                                                                                                                                                                  |                                                                                                |                                                                                                                                                                                                                                                        |
| ε <sub>Nd</sub>                                          | -16.9 <sup>6</sup>                                                                                                                                                                                                                   |                                                                                                |                                                                                                                                                                                                                                                        |
| Pb                                                       |                                                                                                                                                                                                                                      |                                                                                                |                                                                                                                                                                                                                                                        |
| Rb/Sr                                                    | 0.52 ± 0.05 <sup>1</sup>                                                                                                                                                                                                             |                                                                                                |                                                                                                                                                                                                                                                        |
| REE                                                      | La/Yb~40, Eu/Eu*~0.7 <sup>4</sup>                                                                                                                                                                                                    |                                                                                                |                                                                                                                                                                                                                                                        |
| Other Trace Elements                                     | yes <sup>3</sup>                                                                                                                                                                                                                     |                                                                                                |                                                                                                                                                                                                                                                        |
| References                                               | <sup>1</sup> Lee et al. (1984a)<br><sup>2</sup> Lee et al. (1982)<br><sup>3</sup> Lee and Van Loenen (1971)<br><sup>4</sup> Lee and Christiansen (1983)<br><sup>5</sup> Lee et al. (1984b)<br><sup>6</sup> Farmer and DePaolo (1983) | <sup>1</sup> Barton (unpublished data)<br><sup>2</sup> Barton and Marvin<br>(unpublished data) | <sup>1</sup> Lee et al. (1984b)<br><sup>2</sup> Lee et al. (1981)<br><sup>3</sup> Lee et al. (1984a)<br><sup>4</sup> Lee et al. (1984c)<br><sup>5</sup> Stewart and Carlson (1978)<br><sup>6</sup> Lee and Marvin (1981)<br><sup>7</sup> Miller (1984) |

Lithophile-element mineralization associated with Late Cretaceous two-mica granites in the Great Basin

Mark D. Barton

| Name                            | Birch Creek<br>(BC)                                                                                | Dawley Canyon<br>(DC)                                                           | Kern Mountains<br>(KM)                                                |
|---------------------------------|----------------------------------------------------------------------------------------------------|---------------------------------------------------------------------------------|-----------------------------------------------------------------------|
| Feature                         |                                                                                                    |                                                                                 |                                                                       |
| HOST                            |                                                                                                    |                                                                                 |                                                                       |
| Formation names and lithologies | mainly Reed dol; lesser Wyman ss, ls, sh; farther away Campito & Deep Spring (ss, ls) <sup>1</sup> | Prospect Mt. Quartzite; schists and quartzites (McCoy Creek equiv.); Granitoids | Nevada Fm., dolomite; Guilmotte Ls.; Pilot and Chainman Shales        |
| Textures                        | massive clean dolomite, lesser quartzitic clastics <sup>1</sup>                                    | quartzites and schists <sup>1</sup>                                             | marbles to hornfels to tectonites <sup>1,2</sup>                      |
| Age(s)                          | late Precambrian to Cambrian <sup>1</sup>                                                          | late Precambrian to early Cambrian; Jurassic (?) granitoids <sup>1</sup>        | Devonian to Mississippian to Pennsylvanian(?) <sup>2</sup>            |
| Pre-intrusion Metamorphism      | in aureole of Beer Creek pluton, cuts across gradient <sup>2</sup>                                 | Bi+Gt±Sill grade forming schists and quartzites <sup>2</sup>                    | none(?)                                                               |
| Extents                         | Beer Creek aureole extends across the BC area in Wyman and Reed <sup>2,1</sup>                     | pCsq on S, J(?) on W and N <sup>1</sup>                                         |                                                                       |
| Style of emplacement            | forceful <sup>1</sup>                                                                              | forceful(?) <sup>1,2</sup>                                                      | forceful <sup>1</sup>                                                 |
| References                      | <sup>1</sup> Nelson and Sylvester (1971)<br><sup>2</sup> Gastil et al. (1967)                      | <sup>1</sup> Howard et al. (1979)<br><sup>2</sup> Olson and Hinrichs (1960)     | <sup>1</sup> Best et al. (1974)<br><sup>2</sup> Hose and Blake (1976) |

Lithophile-element mineralization associated with Late Cretaceous two-mica granites in the Great Basin

Mark D. Barton

| Name                            | Lexington Creek<br>(LC)                                                      | McCullough Butte<br>(MB)                                                               | Mount Wheeler Mine<br>(MW)                                                                                              |
|---------------------------------|------------------------------------------------------------------------------|----------------------------------------------------------------------------------------|-------------------------------------------------------------------------------------------------------------------------|
| Feature                         |                                                                              |                                                                                        |                                                                                                                         |
| HOST                            |                                                                              |                                                                                        |                                                                                                                         |
| Formation names and lithologies | Pole Canyon Ls.; Pioche Sh. (sh and ls); Prospect Mt. Quartzite <sup>1</sup> | Pogonip Group (ls±dol); Eureka (ortho)Quartzite; Hanson Creek Fm. (dol) <sup>1,2</sup> | Pole Canyon Ls.; Pioche Sh. (sh and ls); Prospect Mt. Quartzite <sup>1,3</sup>                                          |
| Textures                        | marble tectonites, <sup>1</sup> contact is prob. S. Snake Range decoll.      | micrites to sparites; ortho-quartzites to cc sandstones <sup>2</sup>                   | quartz arenite, siltstone, argill. siltstone, rxllized ls <sup>1,2,3</sup>                                              |
| Age(s)                          | Cambrian                                                                     | Ordovician-Silurian <sup>1,2</sup>                                                     | Cambrian <sup>1</sup>                                                                                                   |
| Pre-intrusion                   | not known                                                                    | none? <sup>2</sup>                                                                     | chlorite grade(?) <sup>2</sup>                                                                                          |
| Metamorphism                    |                                                                              |                                                                                        |                                                                                                                         |
| Extents                         |                                                                              |                                                                                        | regional in Cambrian and older rocks (?)                                                                                |
| Style of emplacement            | forceful (?)                                                                 | ?                                                                                      |                                                                                                                         |
| References                      | <sup>1</sup> Whitebread (1969)                                               | <sup>1</sup> Barton (1982)<br><sup>2</sup> Barton (in prep.)                           | <sup>1</sup> Whitebread (1969)<br><sup>2</sup> E.L. Miller (1985, person. com<br><sup>3</sup> Whitebread and Lee (1961) |

Lithophile-element mineralization associated with Late Cretaceous two-mica granites in the Great Basin

Mark D. Barton

| Name                            | Pole Canyon<br>(PC)                                                            | Rocky Canyon<br>(RC)                                                | Toana Range<br>(TR)                                                       |
|---------------------------------|--------------------------------------------------------------------------------|---------------------------------------------------------------------|---------------------------------------------------------------------------|
| Feature                         |                                                                                |                                                                     |                                                                           |
| HOST                            |                                                                                |                                                                     |                                                                           |
| Formation names and lithologies | Pole Canyon Ls.; Pioche Shale (sh and ls); Prospect Mt. Quartzite <sup>1</sup> | Secret Canyon Sh. (?); Geddes Ls.(?); Eldorado Dol.(?) <sup>1</sup> | Prospect Mountain Quartzite <sup>1</sup>                                  |
| Textures                        | micaceous ss to siltstone to ls (marble) <sup>1</sup>                          | shale; calcareous shale; ls; dol <sup>1</sup>                       |                                                                           |
| Age(s)                          | Cambrian                                                                       | Cambrian                                                            | Cambrian; 75.6±2.1, 72.5±2.0 (K-Ar on metamorphic Mu) <sup>2</sup>        |
| Pre-intrusion                   | regional greenschist(?) <sup>4</sup> ; hbl                                     | none(?), chlorite zone(?)                                           | none(?)                                                                   |
| Metamorphism                    | hnfls due to J pluton <sup>2</sup>                                             |                                                                     |                                                                           |
| Extents                         | pluton intrudes Cpm with others nearby <sup>1</sup>                            | dikes in all three                                                  |                                                                           |
| Style of emplacement            | forceful <sup>1</sup> ; lack of xenoliths, dips generally radiate              | ?                                                                   | ?                                                                         |
| References                      | <sup>1</sup> Whitebread (1969)                                                 | <sup>1</sup> Barton (in prep.)                                      | <sup>1</sup> Stewart and Carlson (1978)<br><sup>2</sup> Lee et al. (1980) |

# Lithophile-element mineralization associated with Late Cretaceous two-mica granites in the Great Basin

Mark D. Barton

| Name                                                              | Birch Creek<br>(BC)                                                                                                                                                                             | Dawley Canyon<br>(DC)                                                                                                                            | Kern Mountains<br>(KM)                                                                                                                                                                                                                       |
|-------------------------------------------------------------------|-------------------------------------------------------------------------------------------------------------------------------------------------------------------------------------------------|--------------------------------------------------------------------------------------------------------------------------------------------------|----------------------------------------------------------------------------------------------------------------------------------------------------------------------------------------------------------------------------------------------|
| Feature                                                           |                                                                                                                                                                                                 |                                                                                                                                                  |                                                                                                                                                                                                                                              |
| ALTERATION/<br>MINERALIZATION                                     |                                                                                                                                                                                                 |                                                                                                                                                  |                                                                                                                                                                                                                                              |
| Igneous (types and<br>sequence, including<br>envelopes)           | pegmatitic Qz veins; Qz veins<br>with greisen envelopes; pervasive<br>greisen in dikes <sup>1,2</sup>                                                                                           | pegmatites and quartz veins<br>with be+tourm+colum etc.;<br>albititized granite <sup>2</sup>                                                     | Qz+Hb+Py+Fl+Triplite±Gn±<br>Sph±Ccp veins w/ greisen env.;<br>greisenization with beryl                                                                                                                                                      |
| Host (thermal)                                                    | progressive cc+dol+tc-->do+cc+tr<br>-->do+cc+fo-->di+serp (veins) in<br>Reed; marble, calc-hornfels in<br>Wyman <sup>1</sup>                                                                    | ?                                                                                                                                                | hornfels in pelitic units; coarse,<br>low-Fe calcsilicates and hornfels<br>in calcareous units with marble                                                                                                                                   |
| Host (metasomatic;<br>types and sequence,<br>including envelopes) | Gt+Cpx+Id±Ep±Fl early skarn<br>-->Ep(-->Czo)+Fl+Pc-->Chl veins<br>w/ similar(?) envelopes-->Mu+Fl±<br>Be±Qz veins w/ Fl envelopes--><br>Qz+sulfide veins-->silicified<br>carbonate <sup>2</sup> | intruded by pegmatites <sup>2</sup>                                                                                                              | stockwork of veins and skarn;<br>associated with border aplite and<br>related dikes; Gt+Id+Cpx±Ep±<br>Hbl skarn; Pc+Czo+Fl veins w/<br>Bi envelopes; Mu+Fl vein; Qz+<br>Mu+Fl veins <sup>3</sup> ; Qz+Td+Fl+Sch<br>veins in dol <sup>2</sup> |
| Extent of thermal                                                 | up to 500 m; see (1) for details                                                                                                                                                                |                                                                                                                                                  | >1000 m from contact                                                                                                                                                                                                                         |
| Extent of metasomatic                                             | skarn concentrated on NW contact;<br>widespread Qz-base-metal veins to<br>N, W, and S <sup>2</sup>                                                                                              | pegmatites extend < 200 m from<br>contact <sup>2</sup>                                                                                           | 100-200 m from contact, anhydrous<br>is closest in; veins >300m are<br><1m thick <sup>3</sup>                                                                                                                                                |
| Mineral compositions                                              | Gt(Gr <sub>45</sub> Ad <sub>50</sub> -->Gr <sub>40</sub> Ad <sub>50</sub> ,<br>minor early Ad <sub>95</sub> ) <sup>2</sup>                                                                      |                                                                                                                                                  |                                                                                                                                                                                                                                              |
| Isotopic compositions                                             |                                                                                                                                                                                                 |                                                                                                                                                  | C,O,H indicate magmatic                                                                                                                                                                                                                      |
| Fluid compositions                                                | H <sub>2</sub> O(CO <sub>2</sub> )≤moderate salinity<br>fluid inclusions <sup>2</sup>                                                                                                           | H <sub>2</sub> O(CO <sub>2</sub> )≤moderate salinity<br>fluid inclusions in Qz and Be <sup>1</sup>                                               | H <sub>2</sub> O(CO <sub>2</sub> )≤moderate salinity fluid<br>inclusions in Id, etc., sometimes<br>with carbonate daughter <sup>3</sup>                                                                                                      |
| P (methods)                                                       | 2 ± 1 kb <sup>3</sup> (strat. recon.)                                                                                                                                                           | >3 (strat. recon.) <sup>3</sup> ; ≥ 3.5 (mu<br>breakdown) <sup>4</sup>                                                                           | 1.5 - 2 kb (strat. recon.) <sup>1</sup>                                                                                                                                                                                                      |
| T (ranges, methods)                                               |                                                                                                                                                                                                 |                                                                                                                                                  |                                                                                                                                                                                                                                              |
| Elements added                                                    | Al,Fe,Si,F,Be,W,Cu,<br>(Au,Ag,Pb,Zn,Sb)                                                                                                                                                         | (Be,Nb,Ta,B),Na                                                                                                                                  | Si,Al,Fe,W,F,K,Na,Cu,<br>Ag,Sb                                                                                                                                                                                                               |
| Resource potential                                                | ~0.5 km <sup>2</sup> of 5-10% stockwork<br>skarn containing up to 60% Fl,<br>5% Sch, 2% Be, but averaging<br>much less (10%, 0.1%, 0.05%?);<br>small precious metal production <sup>2,4</sup>   | a small amount of muscovite<br>production; >20 small beryl-<br>bearing pegmatites (≤0.1%<br>BeO) <sup>2</sup>                                    | <20,000 tons of 0.5% WO <sub>3</sub> from<br>granite; stockwork skarn occurs<br>sporadically along >3 km of<br>contact containing <0.1% WO <sub>3</sub>                                                                                      |
| References                                                        | <sup>1</sup> Nelson and Sylvester (1971)<br><sup>2</sup> Pickering and Barton<br>(unpublished data)<br><sup>3</sup> estimated<br><sup>4</sup> Diggles and Blakely (1983)                        | <sup>1</sup> Barton (unpublished data)<br><sup>2</sup> Olson and Hinrichs (1960)<br><sup>3</sup> estimated<br><sup>4</sup> Kistler et al. (1981) | <sup>1</sup> estimated<br><sup>2</sup> Hose and Blake (1976)<br><sup>3</sup> Barton (unpublished data)                                                                                                                                       |



# Lithophile-element mineralization associated with Late Cretaceous two-mica granites in the Great Basin

Mark D. Barton

| Name                                                              | Lexington Creek<br>(LC)                                                                                                      | McCullough Butte<br>(MB)                                                                                                                                                                                                                                               | Mount Wheeler Mine<br>(MW)                                                                                                                                                                 |
|-------------------------------------------------------------------|------------------------------------------------------------------------------------------------------------------------------|------------------------------------------------------------------------------------------------------------------------------------------------------------------------------------------------------------------------------------------------------------------------|--------------------------------------------------------------------------------------------------------------------------------------------------------------------------------------------|
| Feature                                                           |                                                                                                                              |                                                                                                                                                                                                                                                                        |                                                                                                                                                                                            |
| ALTERATION/<br>MINERALIZATION                                     |                                                                                                                              |                                                                                                                                                                                                                                                                        |                                                                                                                                                                                            |
| Igneous (types and<br>sequence, including<br>envelopes)           | abundant greisenization; deuteri-<br>c alteration with Qz±Fl±Mu±Ep<br>veins <sup>1,2</sup>                                   | Qz and pegm. veins-->bleached<br>and greisenized (Mu+Fl+Czo±<br>Ap) envelopes <sup>2,1</sup>                                                                                                                                                                           |                                                                                                                                                                                            |
| Host (thermal)                                                    | marble                                                                                                                       | progressive Tr-->Di-->Wo (± Tc<br>in dol); mssv near Qtzite contacts,<br>ab. marble nr center <sup>1,2</sup>                                                                                                                                                           | chlorite+biotite in Pioche,<br>marble in Pole Canyon ls <sup>1</sup>                                                                                                                       |
| Host (metasomatic;<br>types and sequence,<br>including envelopes) | Gt+Cpx+Amph+Ep early skarn<br>-->Qz+Mu+Fl veins <sup>2</sup>                                                                 | stockwork veins and skarn; Gt+<br>Cpx±Id±Fl-->Pc and/or Ep +Fl<br>±Chl±Sch±Py±Sph±Ap veins w/<br>Amph+Chl+Fl+... skarn-->Mu+<br>Fl±Be±Ap±Sph±Py±Carb vein w/<br>Fl+Phl±Act±Py±... skarn-->Qz+<br>Fl±Mu±Carb±Py veins-->Qz+<br>Carb±Bar±Ag sulfosalt veins <sup>2</sup> | Mu+Fl±Be mineral±Sch veins<br>w/ Phl±Fl envelopes w/ later<br>Qz+Mu+Fl±Be±Ph±Bt±Sch±<br>Carb±Wolf veins; Qz+Carb±Sch<br>veins in marble; nearby base-<br>metal silica veins <sup>1,2</sup> |
| Extent of thermal                                                 | ?                                                                                                                            | >3000 m from center of system                                                                                                                                                                                                                                          | ?                                                                                                                                                                                          |
| Extent of metasomatic                                             | ?                                                                                                                            | Gt<800m; Pc<1200m; Mu<2000m;<br>Qz<3000m; Ag>4000m; all but<br>Qz and Ag in carb. <sup>2,1</sup>                                                                                                                                                                       | >3 x 3 km <sup>2 1</sup>                                                                                                                                                                   |
| Mineral compositions                                              |                                                                                                                              | yes <sup>2,1</sup> ; Gt(Gr <sub>85-45</sub> Ad <sub>10-40</sub> ); Cpx<br>(Di <sub>45-5</sub> Hd <sub>50-95</sub> ); others                                                                                                                                            |                                                                                                                                                                                            |
| Isotopic compositions                                             |                                                                                                                              | mostly magm. C,O,H; meteoric<br>in late veins; heavy sulfur <sup>3,1</sup>                                                                                                                                                                                             |                                                                                                                                                                                            |
| Fluid compositions                                                |                                                                                                                              | H <sub>2</sub> O(CO <sub>2</sub> )≤moderate salinity<br>fluid inclusions often with carb.<br>daughter <sup>3</sup>                                                                                                                                                     | H <sub>2</sub> O(CO <sub>2</sub> )≤moderate salinity<br>fluid inclusions <sup>1</sup>                                                                                                      |
| P (methods)                                                       | 2.5 ± 0.5 kb <sup>3</sup> (strat. recon.)                                                                                    | 2 ± 0.5 kb (strat. recon.) <sup>2</sup>                                                                                                                                                                                                                                | 2.5 ± 0.5 kb (strat. recon.) <sup>3</sup>                                                                                                                                                  |
| T (ranges, methods)                                               |                                                                                                                              | >500(igneous, anhyd. skarn) to<br>400-500 (Pc-Ep-Amph) to <350<br>(Mu,Qz); isotope and phase <sup>3</sup>                                                                                                                                                              |                                                                                                                                                                                            |
| Elements added                                                    | Al,Fe,Si,F,W(?)                                                                                                              | Si,Al,F,Fe,K,Na,Be,W,Sn,<br>Zn,Ag,Bi,Cu,Mo                                                                                                                                                                                                                             | Si,Al,F,Be,W,Sn,Ag,Pb                                                                                                                                                                      |
| Resource potential                                                | abundant greisen in pluton;<br>minor skarn containing only<br>Fl on one side (the contact is<br>mostly a fault) <sup>2</sup> | >110 M tons of >10% CaF <sub>2</sub> ;<br>probably ~10 <sup>9</sup> tons skarn with<br>>5% CaF <sub>2</sub> , ~1% Zn, 100-1000<br>ppm W, 20-200 ppm Be,Mo,Sn                                                                                                           | >>100 K tons 20% CaF <sub>2</sub> ,<br>0.5% WO <sub>3</sub> , 0.7% BeO; poss.<br>>10 M tons in the area, much<br>is mineralized, but unexplored                                            |
| References                                                        | <sup>1</sup> Whitebread (1969)<br><sup>2</sup> Barton (unpublished data)<br><sup>3</sup> estimated                           | <sup>1</sup> Barton (1982)<br><sup>2</sup> Barton (in prep.)<br><sup>3</sup> Barton et al. (in prep.)                                                                                                                                                                  | <sup>1</sup> Barton (unpublished data)<br><sup>2</sup> Stager (1960)<br><sup>3</sup> estimated                                                                                             |

# Lithophile-element mineralization associated with Late Cretaceous two-mica granites in the Great Basin

Mark D. Barton

| Name                                                              | Pole Canyon<br>(PC)                                                                                                                                                                                                                           | Rocky Canyon<br>(RC)                                                                                                          | Toana Range<br>(TR)                                      |
|-------------------------------------------------------------------|-----------------------------------------------------------------------------------------------------------------------------------------------------------------------------------------------------------------------------------------------|-------------------------------------------------------------------------------------------------------------------------------|----------------------------------------------------------|
| Feature                                                           |                                                                                                                                                                                                                                               |                                                                                                                               |                                                          |
| ALTERATION/<br>MINERALIZATION                                     |                                                                                                                                                                                                                                               |                                                                                                                               |                                                          |
| Igneous (types and<br>sequence, including<br>envelopes)           | aprites and pegmatites; Qz veins<br>w/ Py+Mol+Mu w/ greisenized/<br>argillized envelopes <sup>1</sup>                                                                                                                                         | Qz+Py+Mu+Fl veins in<br>greisenized granite <sup>1</sup>                                                                      |                                                          |
| Host (thermal)                                                    | marble and coarse mica schists<br>(perhaps due in part to the Snake<br>Creek pluton) <sup>1</sup>                                                                                                                                             | calc-silicate hornfels (domin.<br>Cz+Tr+Di) in Secret Canyon<br>Shale <sup>1</sup>                                            | schists with Late Cretaceous<br>K-Ar ages <sup>1</sup>   |
| Host (metasomatic;<br>types and sequence,<br>including envelopes) | skarn veins w/ envelopes in carb.<br>Gt±Cpx±Wo±Fl assoc. w/ dikes<br>of aprite in some cases-->Ep and/<br>or Pc +Fl±Chl ... veins w/ Fl-<br>rich envelopes-->rare Mu+Fl±Be<br>±Py-->massive Qz veins ±Mu±<br>Py±Carb±Be (sparse) <sup>1</sup> | Cpx±Gt±Id±Fl skarn-->Qz+Fl<br>+... veins in Amph±Tr+Mt±Py<br>±Sch±Mol+Fl+Qz±Cc skarn                                          | ?                                                        |
| Extent of thermal                                                 | >400 m (?) <sup>1</sup>                                                                                                                                                                                                                       | >400 m <sup>1</sup>                                                                                                           | ?                                                        |
| Extent of metasomatic                                             | >400 m (?) <sup>1</sup>                                                                                                                                                                                                                       | >400 m <sup>1</sup>                                                                                                           |                                                          |
| Mineral compositions                                              |                                                                                                                                                                                                                                               |                                                                                                                               |                                                          |
| Isotopic compositions                                             |                                                                                                                                                                                                                                               |                                                                                                                               |                                                          |
| Fluid compositions                                                | H <sub>2</sub> O(CO <sub>2</sub> )≤moderate salinity<br>fluid inclusions with carbonate<br>daughter minerals <sup>1</sup>                                                                                                                     | H <sub>2</sub> O(CO <sub>2</sub> )≤moderate salinity<br>fluid inclusions <sup>2</sup>                                         |                                                          |
| P (methods)                                                       | 2.5 ± 0.5 kb (strat. recon.) <sup>2</sup>                                                                                                                                                                                                     | 2.0 ± 0.5 kb (strat. recon.) <sup>1</sup>                                                                                     | 2.5 ± 0.5 kb (strat. recon.) <sup>2</sup>                |
| T (ranges, methods)                                               |                                                                                                                                                                                                                                               |                                                                                                                               |                                                          |
| Elements added                                                    | Si,Al,F,Fe,Be,Na,K                                                                                                                                                                                                                            | F,S,W,Mo                                                                                                                      |                                                          |
| Resource potential                                                | <5% veins+skarn in marble<br>along >200m of Pole Canyon/<br>Pioche contact; only small<br>amounts of Sch and Be seen <sup>1</sup>                                                                                                             | abundant stockwork skarn<br>veins in hornfels(?) exposed<br>in 430 m drill hole; known<br>over area >200 x 600 m <sup>1</sup> | ?                                                        |
| References                                                        | <sup>1</sup> Barton (unpublished data)<br><sup>2</sup> estimated                                                                                                                                                                              | <sup>1</sup> Barton (in prep.)<br><sup>2</sup> Barton (unpublished data)                                                      | <sup>1</sup> Lee et al. (1980)<br><sup>2</sup> estimated |

References Cited in Appendix 1.

- Barton, M.D., 1982, Some aspects of the geology and mineralogy of the fluorine-rich skarn at McCullough Butte, Eureka Co., Nevada: Carnegie Institution of Washington, Year Book, v. 81, p. 324-328.
- \_\_\_\_\_, in preparation, Geology and conditions of formation of the fluorine-rich skarn at McCullough Butte, Eureka Co. Nevada.
- \_\_\_\_\_, Ruiz, J., Ito, E., and Jones, L., 1982, Tracer studies of the fluorine-rich skarn at McCullough Butte, Eureka Co., Nevada: Carnegie Institution of Washington, Year Book, v. 81, p. 328-331.
- \_\_\_\_\_, \_\_\_\_\_, and Jones, L., in preparation, Isotopic studies of the fluorine-rich skarn at McCullough Butte, Eureka Co., Nevada.
- Best, M.G., Armstrong, R.L., Graustein, W.C., Embree, G.F., and Ahlborn, R.C., 1974, Mica granites of the Kern Mountains pluton, eastern White Pine County, Nevada: Remobilized basement of the Cordilleran miogeosyncline?: Geological Society of America Bulletin, v. 85, p. 1277-1286.
- Diggles, M.F., and Blakely, R.J., 1983, Mineral resource potential of the White Mountains and Birch Creek Roadless areas, White Mountains, California and Nevada: United States Geological Survey Miscellaneous Field Studies Map MF-1361-D.
- Farmer, G.L., and DePaolo, D.J., 1983, Origin of Mesozoic and Tertiary granite in the western United States and implications for pre-Mesozoic crustal structure 1. Nd and Sr isotopic studies in the geocline of the northern Great Basin: Journal of Geophysical Research, v. 88, p. 3379-3401.
- Gastil, R.G., Delisle, M., and Morgan, J.R., 1967, Some effects of progressive metamorphism of zircons: Geological Society of America Bulletin, v. 78, p. 879-906.
- Hose, R.K., and Blake, M.C., 1976, Geology and Mineral Resources of White Pine County, Nevada: Nevada Bureau of Mines and Geology Bulletin, v. 85, p. 36-105.
- Howard, K.A., Kistler, R.W., Snoke, A.W., and Willden, R., 1979, Geologic map of the Ruby Mountains, Nevada. U.S. Geological Survey Miscellaneous Geologic Investigations Map I-1136.
- Kistler, R.W., Ghent, E.D., and O'Neil, J.R., 1981, Petrogenesis of garnet two-mica granites in the Ruby Mountains, Nevada: Journal of Geophysical Research, v. 86, p. 10591-10606.
- Lee, D.E., and Christiansen, E.H., 1983, The granite problem as exposed in the southern Snake Range, Nevada: Contributions to Mineralogy and Petrology, v. 83, p. 99-116.
- \_\_\_\_\_, Friedman, I., and Gleason, J.D., 1982, The oxygen isotope composition of granitoid and sedimentary rocks of the southern Snake Range, Nevada: Contributions to Mineralogy and Petrology, v. 79, p. 150-158.
- \_\_\_\_\_, \_\_\_\_\_, and \_\_\_\_\_, 1984b, Modification of  $\delta D$  values in eastern Nevada granitoid rocks spatially related to thrust faults: Contributions to Mineralogy and Petrology, v. 88, p. 288-298.
- \_\_\_\_\_, Kistler, R.W., Friedman, I., and Van Loenen, R.E., 1981, Two-mica granites of northeastern Nevada: Journal of Geophysical Research, v. 86, no. B11, p. 10607-10616.
- \_\_\_\_\_, and Marvin, R.F., 1981, Markedly discordant K-Ar ages for coexisting biotite and muscovite from a two-mica granite in the Toana Range, Elko County, Nevada: Isochron/West, no. 32, p. 19.
- \_\_\_\_\_, \_\_\_\_\_, and Mehnert, H.H., 1980, A radiometric age study of Mesozoic-Cenozoic metamorphism in eastern White Pine County, Nevada, and nearby Utah. U.S. Geological Survey Professional Paper 1158-C, p. 17-28.
- \_\_\_\_\_, Stacey, J.S., and Fischer, L., 1984c, Muscovite-phenocrystic two-mica granites of northeastern Nevada are Late Cretaceous in age: United States Geological Survey Bulletin, 1622D.
- \_\_\_\_\_, and Van Loenen, R.E., 1971, Hybrid granitoid rocks of the southern Snake Range, Nevada: United States Geological Survey, Professional Paper 668, 48 p.

Lithophile-element mineralization associated with Late Cretaceous two-mica granites in the Great Basin

Mark D. Barton

- McKee, E.H., and Nash, D.B., 1967, Potassium-argon ages of granitic rocks in the Inyo Batholith, east-central California: Geological Society of America Bulletin, v. 78, p. 669-680.
- Nelson, C.A., and Sylvester, A.G., 1971, Wall rock decarbonation and forcible emplacement of Birch Creek Pluton, southern White Mountains, California: Geological Society of America Bulletin, v. 82, p. 2891-2904.
- Olson, J.C., and Hinrichs, E.N., 1960, Beryl-bearing pegmatites in the Ruby Mountains and other areas in Nevada and northwestern Arizona: United States Geological Survey Bulletin 1082-D, 200 p..
- Stewart, J.H., and Carlson, J.E., 1978, Geologic map of Nevada: 1:500,000, United States Geological Survey.
- Whitebread, D.H., 1969, Geologic Map of the Wheeler Peak and Garrison quadrangles, Nevada and Utah: United States Geological Survey, Miscellaneous Geologic Investigations, Map I-578.
- \_\_\_\_\_, and Lee, D.E., 1961, Geology of the Mount Wheeler mine area, White Pine County, Nevada: United States Geological Survey Professional Paper 424-C, p. C120-C122.
